# Supplementary material
Source: publisher figshare collection journal article supplement (https://springernature.figshare.com/ndownloader/files/20022779)

## Additional files

**Table S1. Performance of methylated gene combinations in scrapings of cervical lesions.**

| Variables                 | CIN 2/CIN 3 | CIS/SCC   |
|---------------------------|-------------|-----------|
| Number of cases           | 10          | 9         |
| DNA Methylation           |             |           |
| <i>BHLHE22+CDO1</i>       |             |           |
| High                      | 0           | 1 (11.1%) |
| Low                       | 10 (100%)   | 8 (88.9%) |
| <i>BHLHE22+CDO1+HAND2</i> |             |           |
| High                      | 0           | 0         |
| Low                       | 10 (100%)   | 9 (100%)  |
| <i>BHLHE22+CDO1+TBX5</i>  |             |           |
| High                      | 0           | 1 (11.1%) |
| Low                       | 10 (100%)   | 8 (88.9%) |

The cut-off values were listed in Table 2.

CIN, Cervical intraepithelial neoplasia; CIS, cervical carcinoma in situ; SCC, Squamous Cell Carcinoma.

**Figure S1. The analytical sensitivity of target genes and limit of *COL2A1* detection.** Linear regression analysis was performed to assess assay linearity. **(A and B)** The  $\Delta C_p$  values and serial percentages of methylated DNA showed a high correlation ( $R^2 = 0.998$  and  $0.99$  for *BHLHEE22* and *CDO1*, respectively). The mean  $\Delta C_p$  values of 0.1% methylated DNA were 7.87 and 7.45 for *BHLHEE22* and *CDO1*, respectively. Additionally, when the DNA template was 118 copies, the mean  $C_p$  value of *COL2A1* was 35.8 **(C)**. Therefore, we defined clinical samples with  $C_p$  values of *COL2A1*  $>36$  as not detectable.

A.

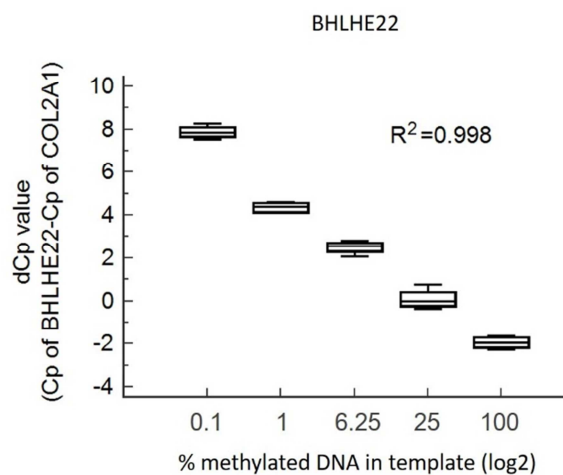

B.

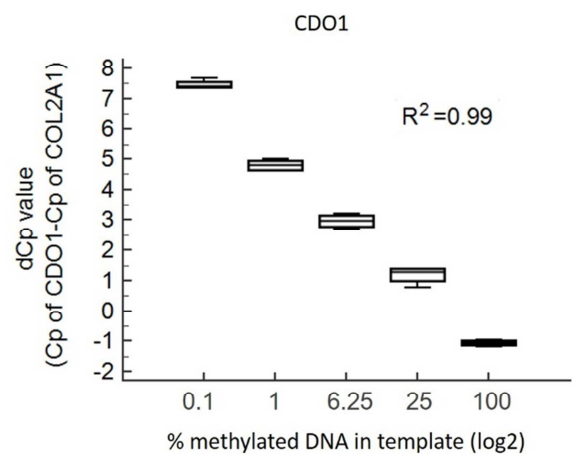

C.

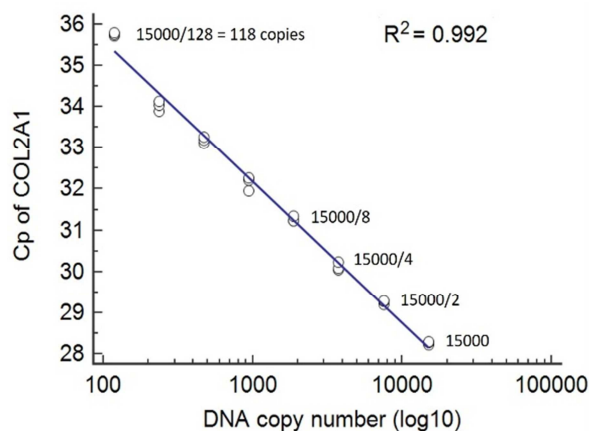

**Figure S2. *PTEN* and *TP53* mutations in cervical squamous cell carcinoma.** We visualized these two genetic mutations from cBioPortal (<https://www.cbioportal.org/>). Copy number alteration data including 278 samples from The Cancer Genome Atlas and the PanCancer Atlas studies were chosen for mutation analysis.

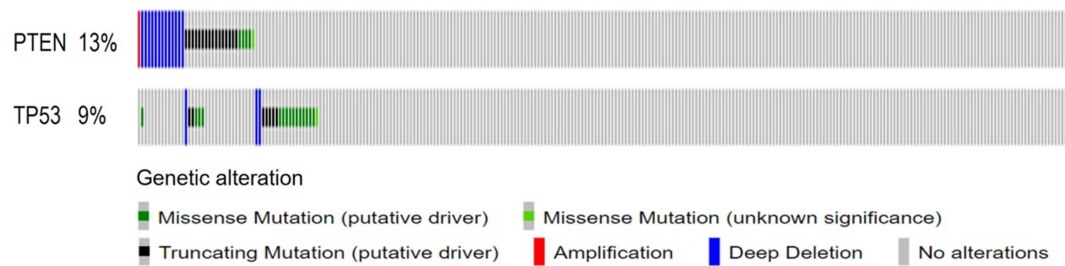

Supplement: Supplementary file [file 20022779]
